# Supplementary material for: Characterisation of particle single scattering albedo with a modified airborne dual-wavelengths CAPS monitor
Source: Copernicus journal article supplement (doi:10.5194/amt-2023-227), 2023-11-09
Supplement: Supplementary file 1 [file amt-2023-227-supplement.pdf]

## Supplement of:

# Characterise the particle single scattering albedo with a modified airborne dual-wavelengths CAPS monitor

Chenjie Yu<sup>1</sup>, Edouard Pangui<sup>2</sup>, Kevin Tu<sup>2</sup>, Mathieu Cazaunau<sup>2</sup>, Maxime Feingesicht<sup>2</sup>, Thierry Bourriane<sup>3</sup>, Timothy B. Onasch<sup>4</sup>, Andrew Freedman<sup>4</sup>, Christopher Cantrell<sup>2</sup>, and Paola Formenti<sup>1</sup>

<sup>1</sup> Université Paris Cité and Univ Paris Est Créteil, CNRS, LISA, F-75013 Paris, France

<sup>2</sup> Univ Paris Est Créteil and Université Paris Cité, CNRS, LISA, F-94010 Créteil, France

<sup>3</sup> CNRM, CNRS/Météo France, Toulouse, France

<sup>4</sup> Aerodyne Research Inc., Billerica, MA 01821-3976, USA

Correspondence to: Chenjie Yu (chenjie.yu@lisa.ipsl.fr) and Paola Formenti (paola.formenti@lisa.ipsl.fr)

### S1 Chamber characterisation experiment

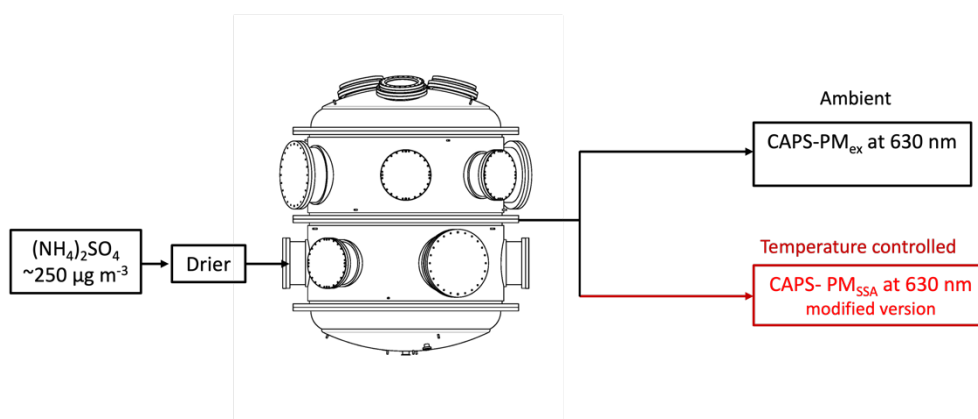

Figure S1 Instrument configurations for the intercomparison study at different pressure levels with controlled temperatures within the CESAM chamber

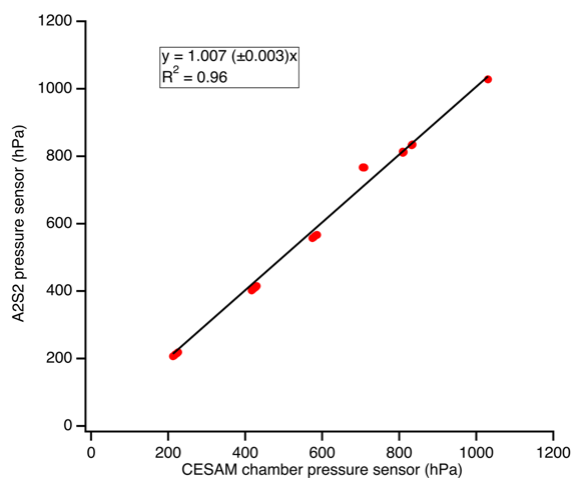

Figure S2 Intercomparison between the CESAM chamber pressure sensor and the A2S2 pressure sensor

## S2 Airborne deployment of the A2S2

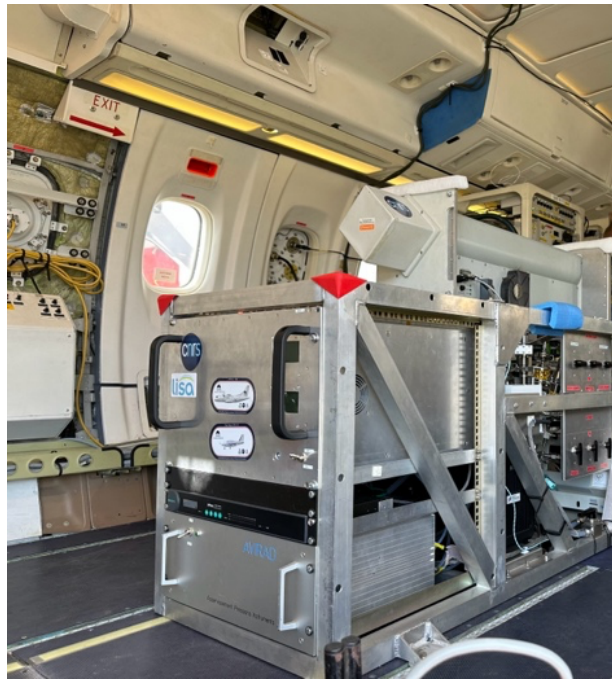

Figure S3 Photo of the A2S2 configured as part of the AVIRAD system onboard the ATR-42

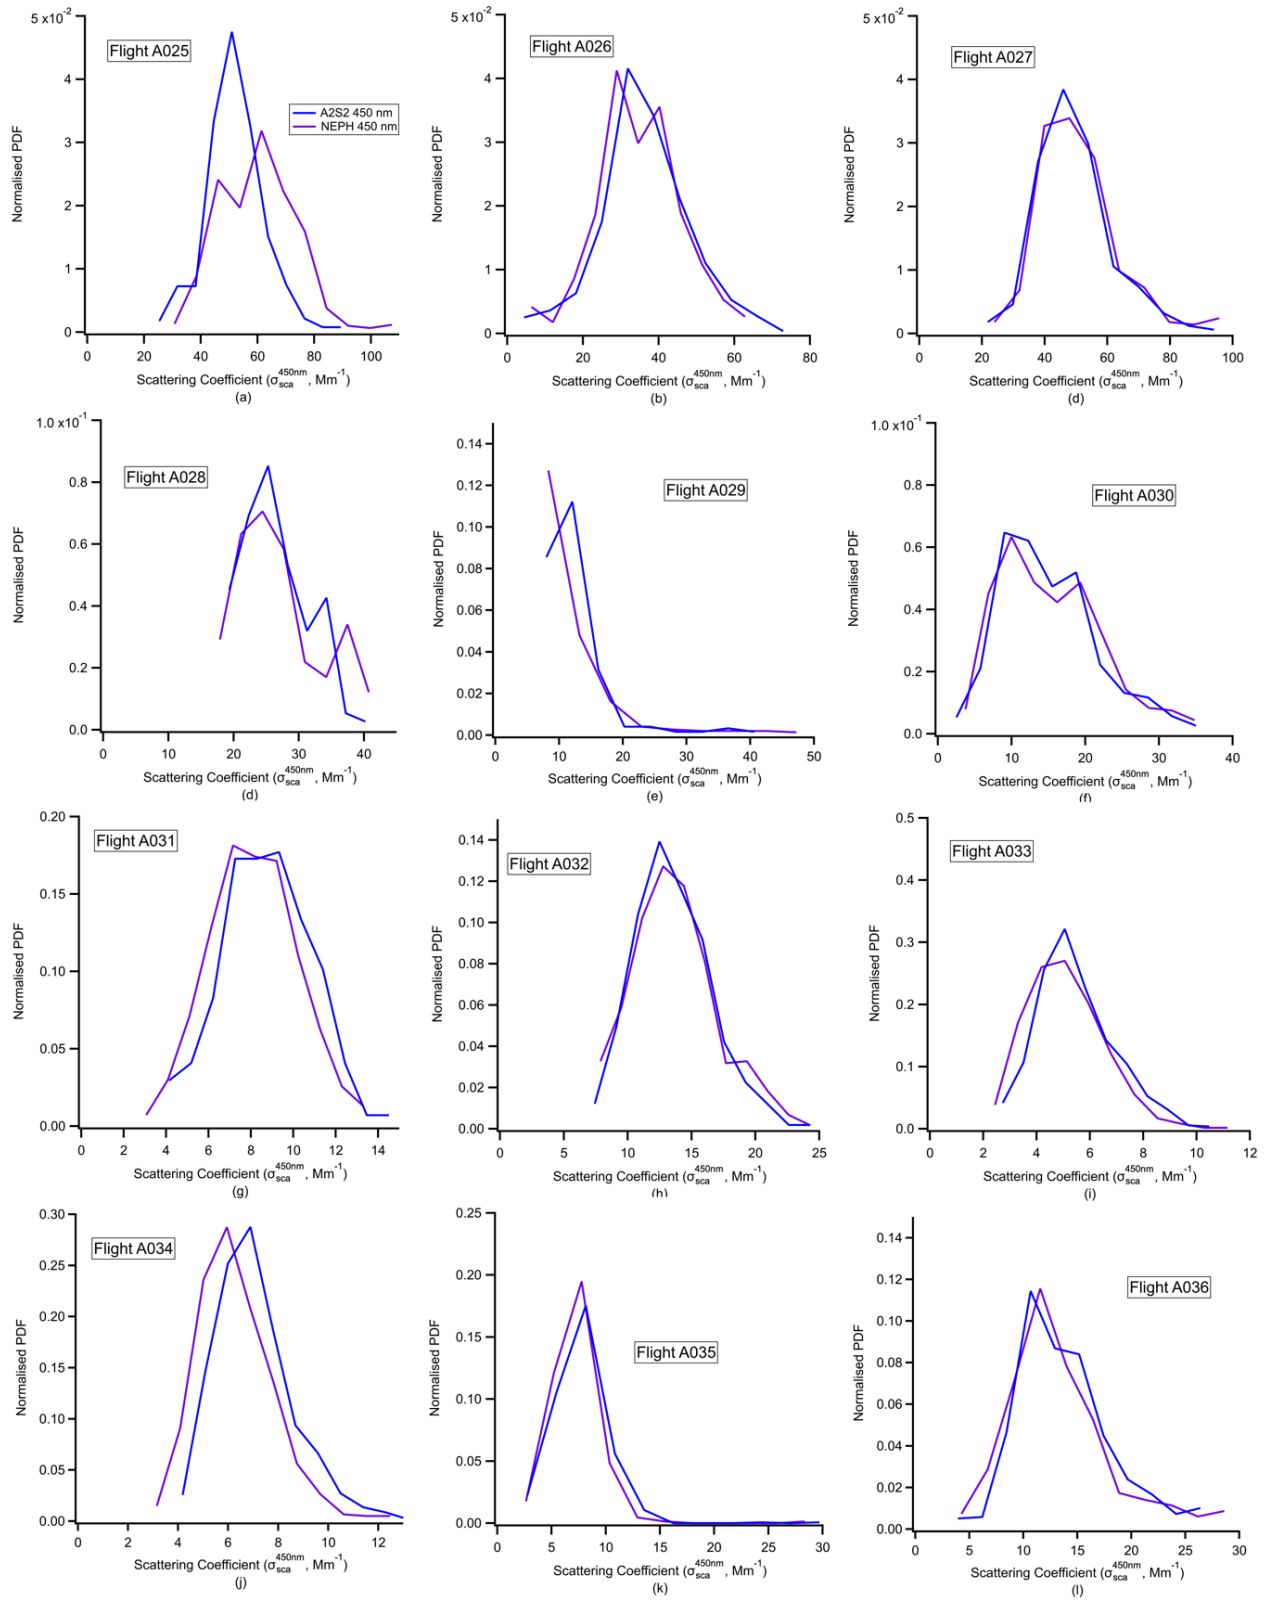

Figure S4 Normalised possibility distribution function (PDF) of A2S2 and NEPH at 450 nm

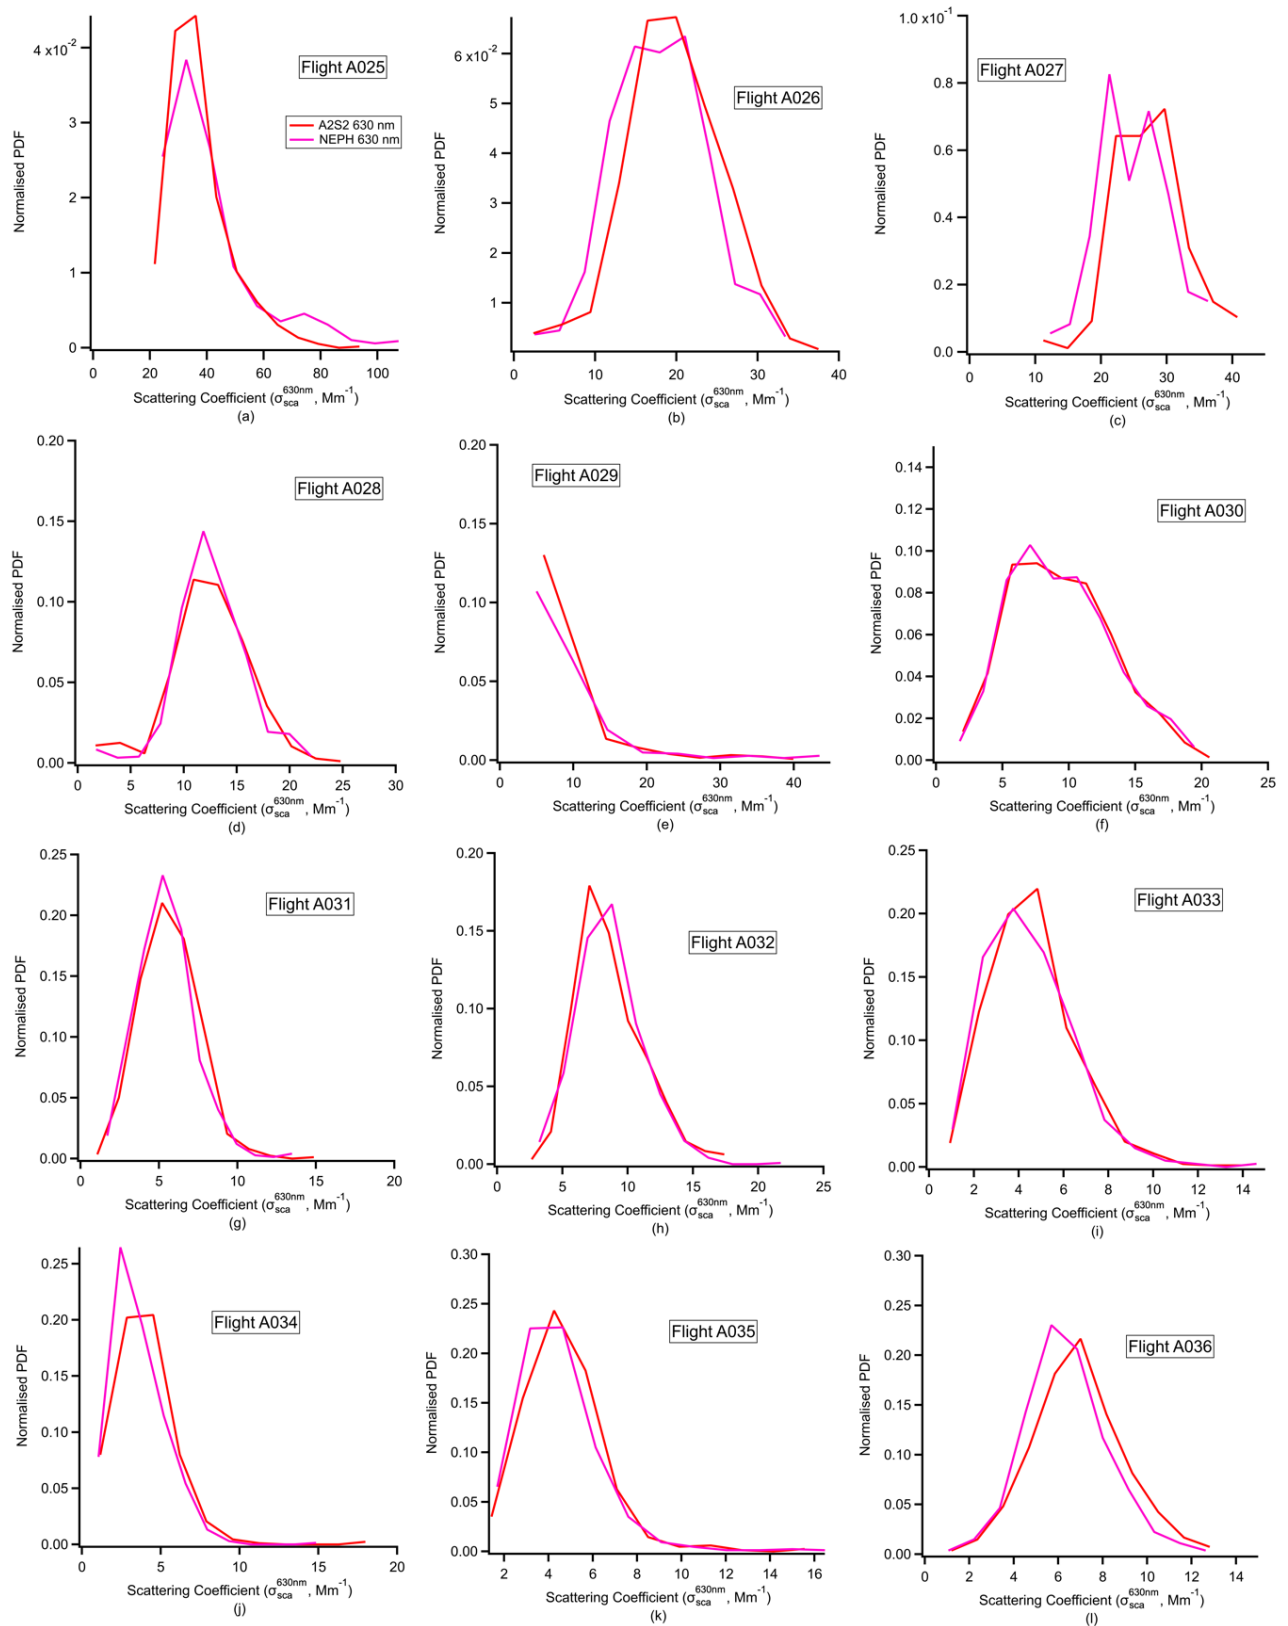

Figure S5 Normalised possibility distribution function (PDF) of A2S2 and NEPH at 630 nm
